# Supplementary material for: Effect of Chitin Nanocrystals Deacetylation on a Nature-Mimicking Interface in Carbon Fiber Composites
Source: Preprints.org preprint supplement (doi:10.20944/preprints202402.0102.v1), 2024-02-02
Supplement: Supplementary file 1 [file supplementary]

**Supporting informations**

Effect of Chitin Nanocrystal Deacetylation on a Nature-Mimicking Interface in Carbon Fiber Composites

A. M. Abdel-Mohsena, R. M. Abdel-Rahmana, L. Kalinab, V. Vishakhac, L. Kaprálkováa, P. Němečeka, J. Jančářb,c, I. Kelnara*

**a** Institute of Macromolecular Chemistry, Czech Academy of Sciences, Heyrovského nám. 2, Praha 162 00, Czech Republic

**b** Faculty of Chemistry, Materials Research Center, Brno University of Technology, Purkyňova 464/118, Brno 612 00, Czech Republic

**c** CEITEC-Central European Institute of Technology, Brno University of Technology, Purkyňova 656/123, Brno 612 00, Czech Republic

*Corresponding author: email: **kelnar@imc.cas.cz**

**Fig. S1.** Rheological characterization of water suspensions (5mg/ml) of single components and adducts

**Fig. S2.** Effects of voltage and DDA percentages on OCF coating efficiency Conditions: 10 min; 5 mg; pH 3.5, rt.

**Fig. S3.** Effect of concetration of GO/ChNCs30 adduct suspension on OCF coating structure Conditions: 10 min, 5 V, DDA 30 %, pH 3.5, different concentration of GO-g-ChNCs (0.01 to 15 mg/ml)., rt.
